# Supplementary figures and images for: Assignment of Raman spectra for trifluoride anions in solid argon
Source: Royal Society of Chemistry journal article supplement (doi:10.1039/c8cp04361b), 2018-01-01

F3ANION.SI

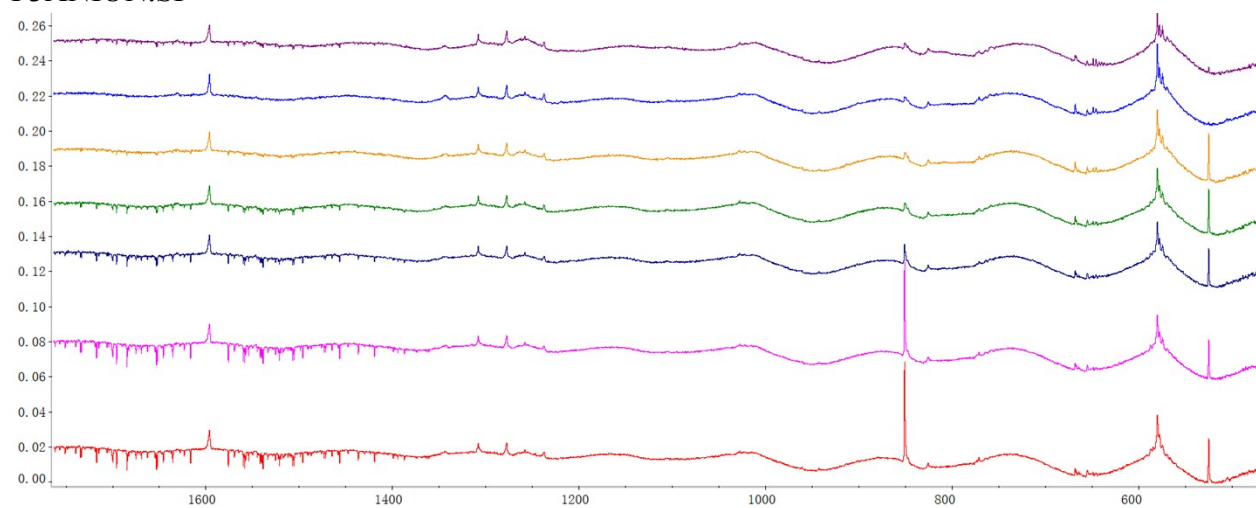

anionSI

Supplement: c8cp04361b1.pdf [file c8cp04361b1.pdf]
